# Supplementary material for: Mitochondrial Trafficking of MLKL, Bak/Bax, and Drp1 Is Mediated by RIP1 and ROS which Leads to Decreased Mitochondrial Membrane Integrity during the Hyperglycemic Shift to Necroptosis
Source: Int J Mol Sci. 2023 May 11;24(10):8609. doi: 10.3390/ijms24108609 (PMC10218403; doi:10.3390/ijms24108609)
Supplement: Supplementary file 1 [file ijms-24-08609-s001.zip › ijms-2341530-supplementary.pdf]

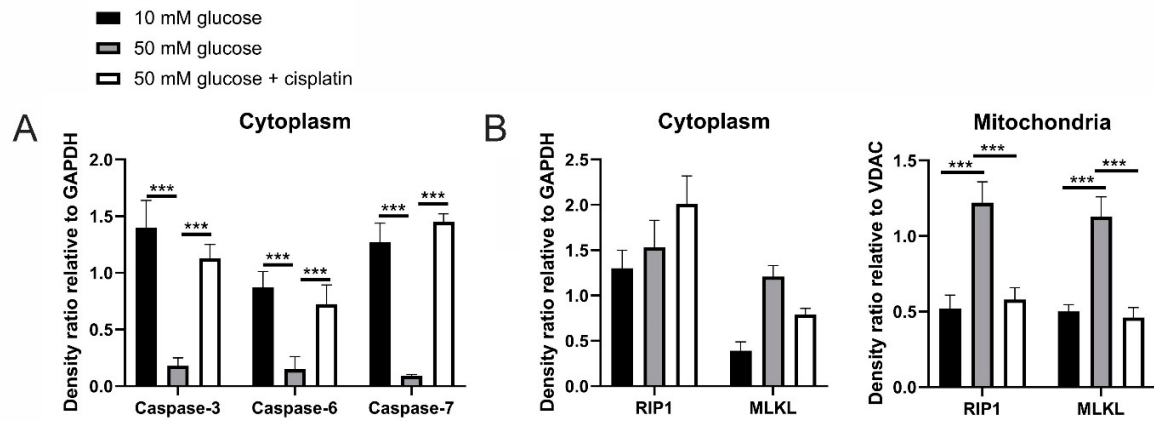

**Figure S1: Cytoplasmic and mitochondrial levels of cell death proteins in 10 and 50 mM glucose with cisplatin. A).** Quantification of cytoplasmic levels of executioner caspases from blot represented in Fig. 1A. Caspases were not detected in the mitochondrial fractions. **B).** Cytoplasmic and mitochondrial levels of RIP1 and MLKL from blot represented in Fig. 1B. Results are from 3 independent experiments. Two-way ANOVA with Bonferroni posttest, \*\*\* $p < 0.001$ .

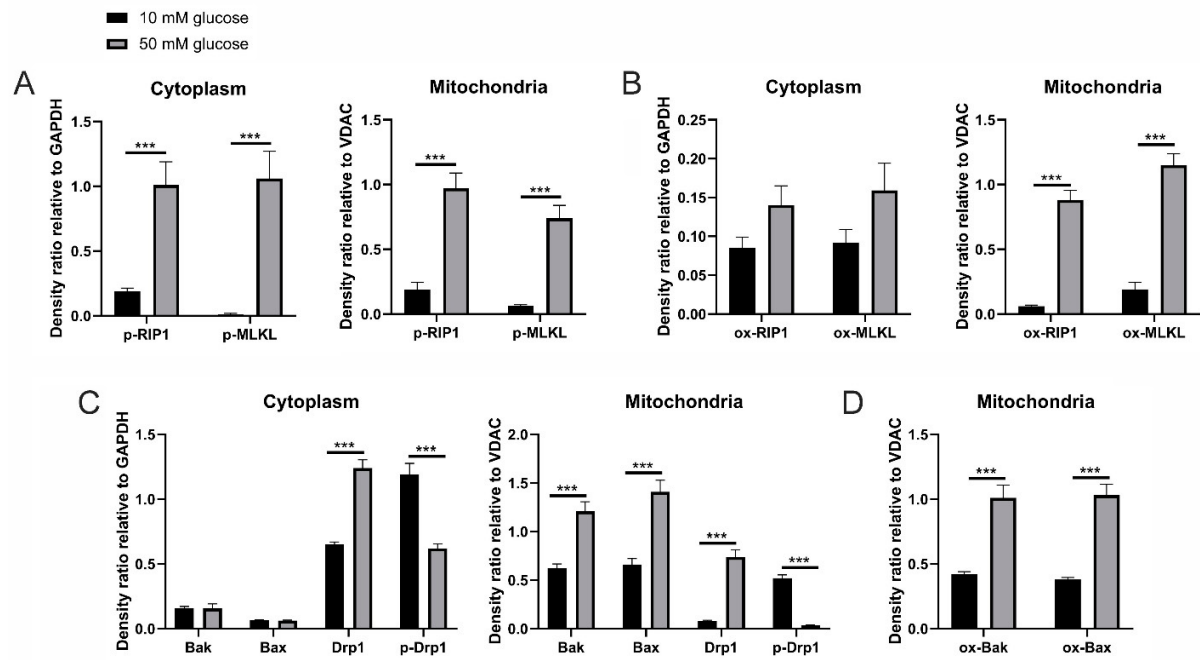

**Figure S2: Cytoplasmic and mitochondrial levels of cell death proteins in 10 and 50 mM glucose. A).** Quantification of cytoplasmic and mitochondrial levels of phosphorylated RIP1 (p-RIP1) and p-MLKL from blot represented in Fig. 2A. **B).** Cytoplasmic and mitochondrial levels of oxidized RIP1 (ox-RIP1) and ox-MLKL from blot represented in Fig. 2B. **C).** Cytoplasmic and mitochondrial levels of Bak, Bax, Drp1, and p-Drp1 from blot represented in Fig. 2C. **D).** Mitochondrial levels of oxidized Bak (ox-Bak) and ox-Bax from blot represented in Fig. 2D. Oxidized Bak and ox-Bax were not detected in the cytoplasmic fraction. Results are from 3 independent experiments. Two-way ANOVA with Bonferroni posttest, \*\*\*p<0.001.

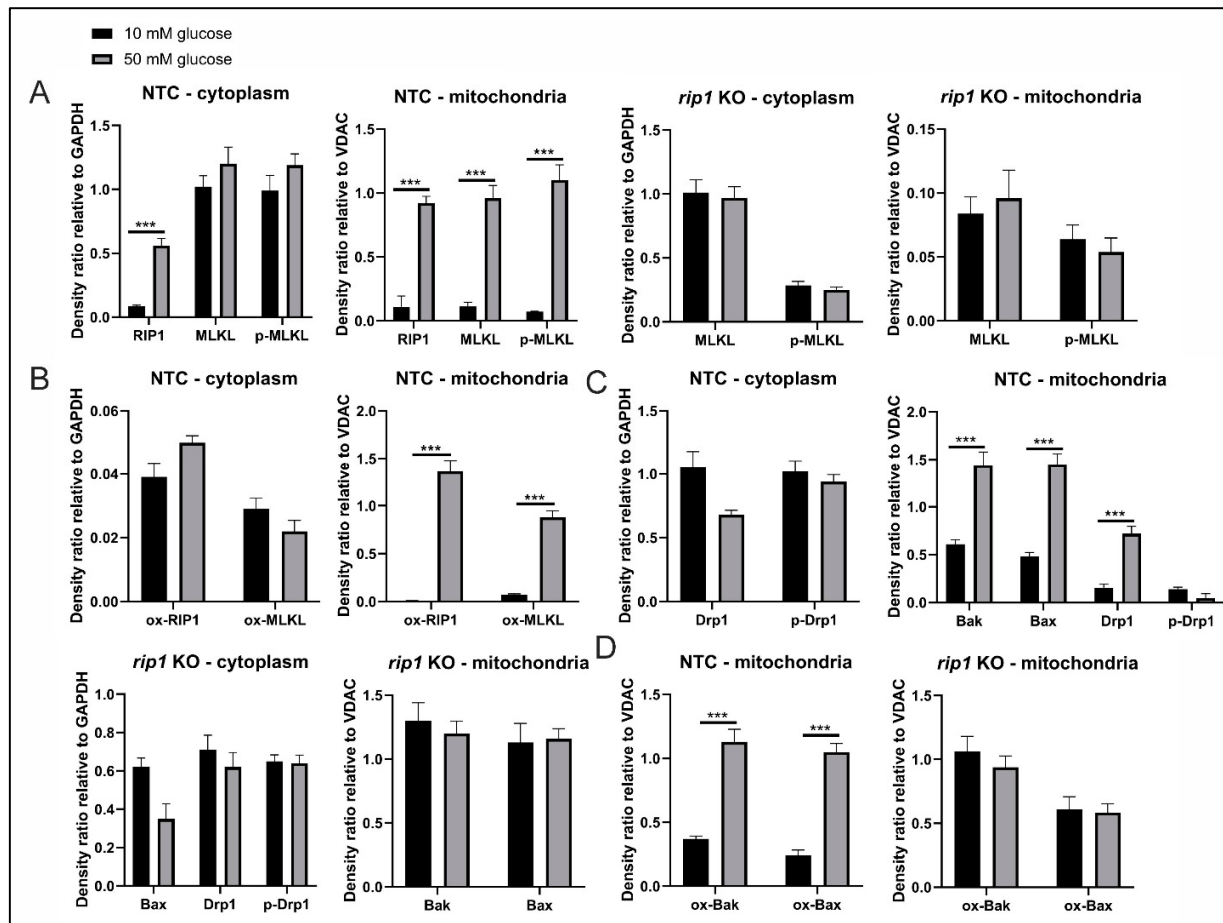

**Figure S3: Effect of RIP1 on cytoplasmic and mitochondrial levels of cell death proteins in 10 and 50 mM glucose. A).** Quantification of cytoplasmic and mitochondrial levels of RIP1, MLKL and phosphorylated MLKL (p-MLKL) in NTC cells from blots represented in Fig. 4A. RIP1 was not detected in *rip1* KO cells. **B).** Cytoplasmic and mitochondrial levels of oxidized RIP1 (ox-RIP1) and ox-MLKL from blot represented in Fig. 4B. The ox-RIP1 and ox-MLKL were not detected in *rip1* KO cells. **C).** Cytoplasmic and mitochondrial levels of Bak, Bax, Drp1, and p-Drp1 from blot represented in Fig. 4C. Bak and Bax were not detected in the cytoplasmic fractions of NTC cells. Bak was not detected in the cytoplasmic fractions of *rip1* KO cells. Drp1 and p-Drp1 were not detected in the mitochondrial fractions of *rip1* KO cells. **D).** Mitochondrial levels of oxidized Bak (ox-Bak) and ox-Bax from blot represented in Fig. 4D. Oxidized Bak and ox-Bax were not detected in the cytoplasmic fractions. Results are from 3 independent experiments. Two-way ANOVA with Bonferroni posttest, \*\*\* $p < 0.001$ .

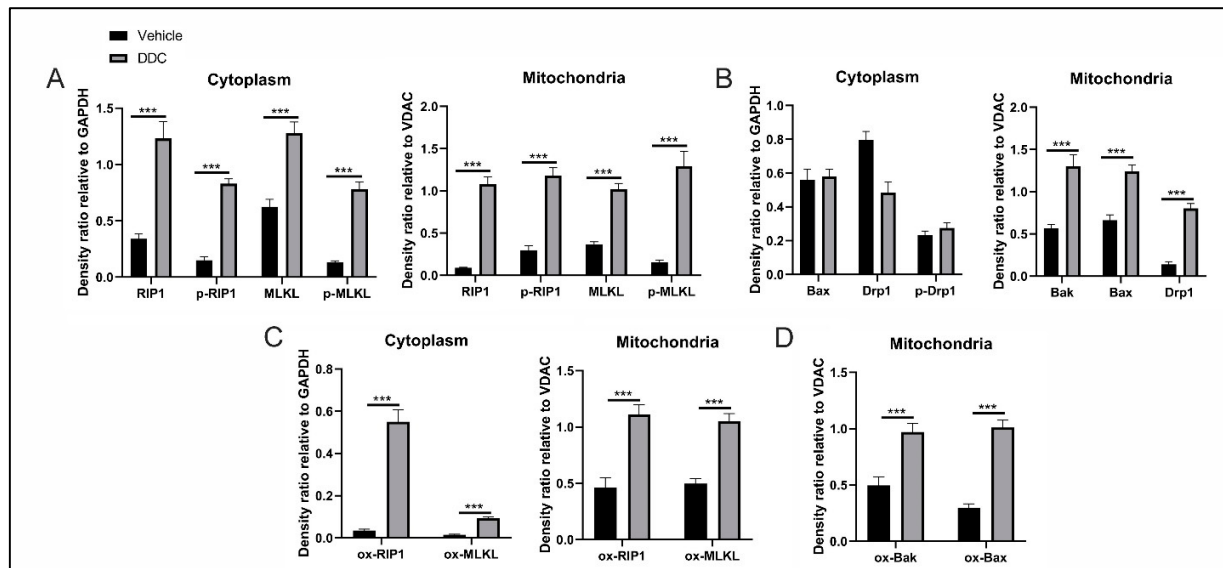

**Figure S4: Effect of ROS induction on cytoplasmic and mitochondrial levels of cell death proteins. A).** Quantification of cytoplasmic and mitochondrial levels of RIP1, MLKL, phosphorylated RIP1 (p-RIP1), and p-MLKL from blots represented in Fig. 5A. **B).** Cytoplasmic and mitochondrial levels of Bak, Bax, Drp1, and p-Drp1 from blot represented in Fig. 5B. Bak was not detected in the cytoplasmic fractions while p-Drp1 was not detected in the mitochondrial fractions. **C).** Cytoplasmic and mitochondrial levels of oxidized RIP1 (ox-RIP1) and ox-MLKL from blot represented in Fig. 5C. **D).** Mitochondrial levels of ox-Bak and ox-Bax from blot represented in Fig. 4D. Oxidized Bak and ox-Bax were not detected in the cytoplasmic fractions. Results are from 3 independent experiments. Two-way ANOVA with Bonferroni posttest, \*\*\* $p < 0.001$ .

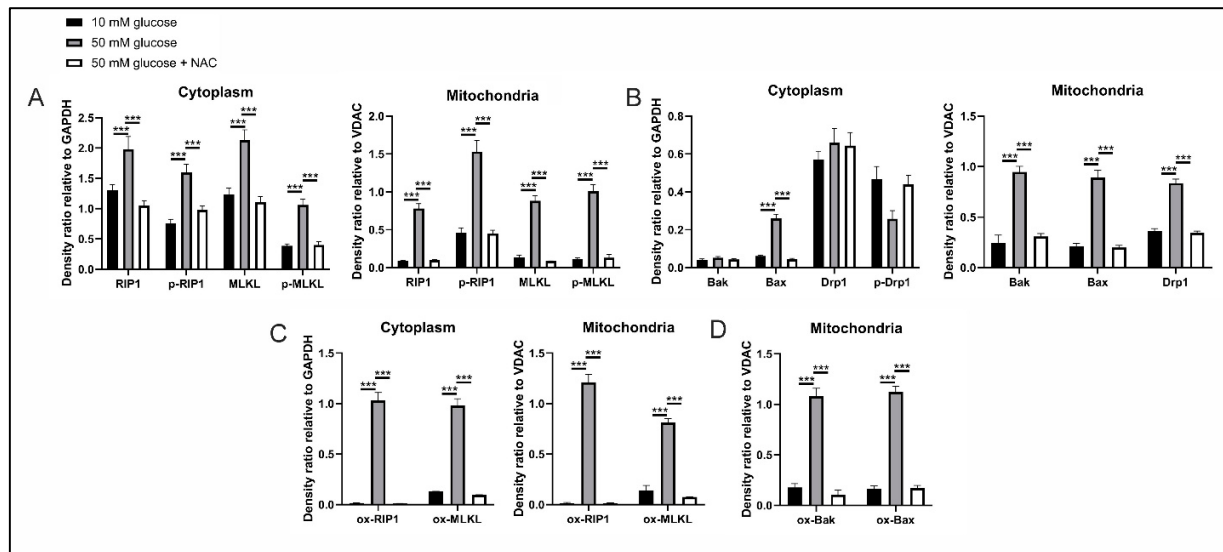

**Figure S5: Effect of ROS inhibition on cytoplasmic and mitochondrial levels of cell death proteins in 10 and 50 mM glucose.** **A).** Quantification of cytoplasmic and mitochondrial levels of RIP1, MLKL, phosphorylated RIP1 (p-RIP1), and p-MLKL from blots represented in Fig. 6A. **B).** Cytoplasmic and mitochondrial levels of Bak, Bax, Drp1, and p-Drp1 from blot represented in Fig. 6B. Phosphorylated Drp1 was not detected in mitochondrial fractions. **C).** Cytoplasmic and mitochondrial levels of oxidized RIP1 (ox-RIP1) and ox-MLKL from blot represented in Fig. 6C. **D).** Mitochondrial levels of ox-Bak and ox-Bax from blot represented in Fig. 6D. Oxidized Bak and ox-Bax were not detected in the cytoplasmic fractions. Results are from 3 independent experiments. Two-way ANOVA with Bonferroni posttest, \*\*\* $p < 0.001$ .

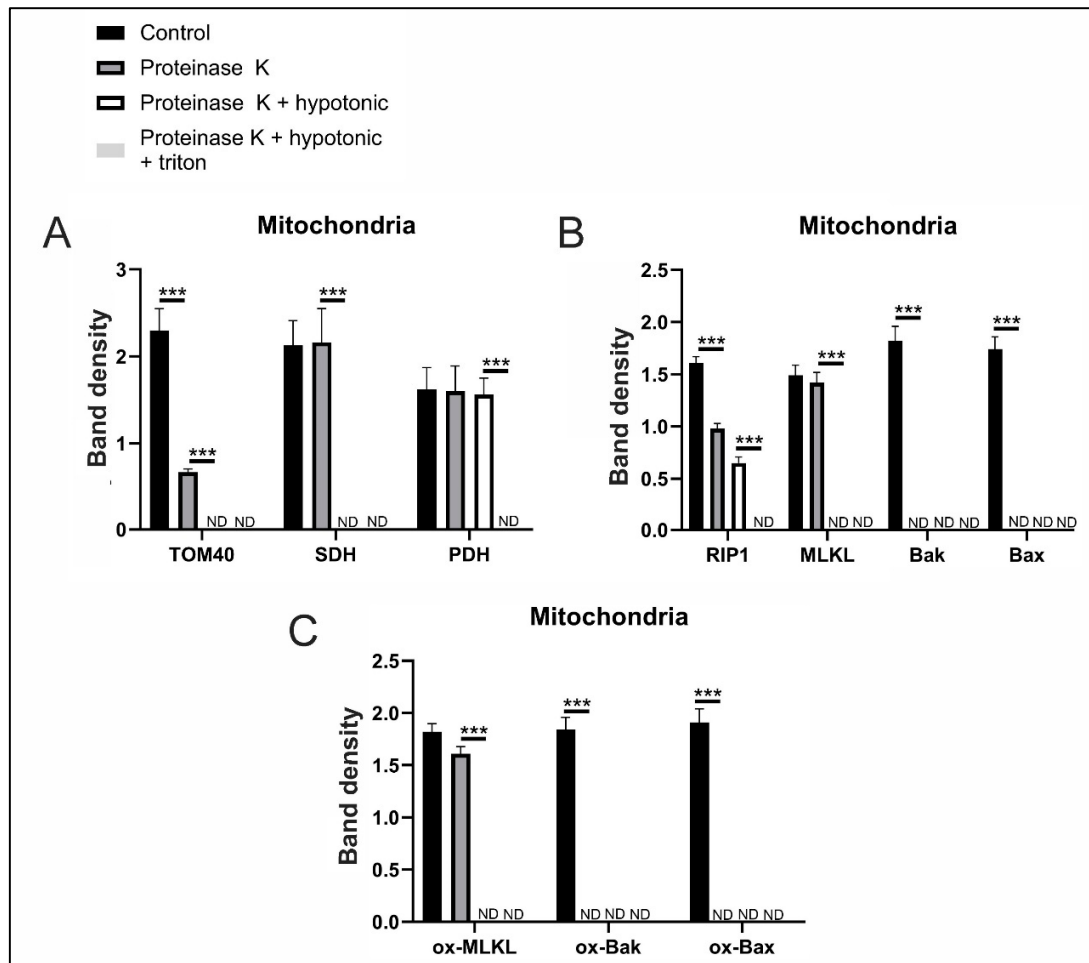

**Figure S6: Sub-mitochondrial locations of cell death proteins in 10 and 50 mM glucose. A).**

Quantification of TOM40, succinate dehydrogenase (SDH) and pyruvate dehydrogenase (PDH) in mitochondrial fractions from blot represented in Fig 7A. **B).** Quantification of RIP1, MLKL, Bak, and Bax in mitochondrial fractions from blot represented in Fig. 7B. **C).** Quantification of oxidized MLKL (ox-MLKL), ox-Bak, and ox-Bax in mitochondrial fractions from blots represented in Figs. 7C-E. ND = not detected. Results are from 3 independent experiments. Two-way ANOVA with Bonferroni posttest, \*\*\*p<0.001.

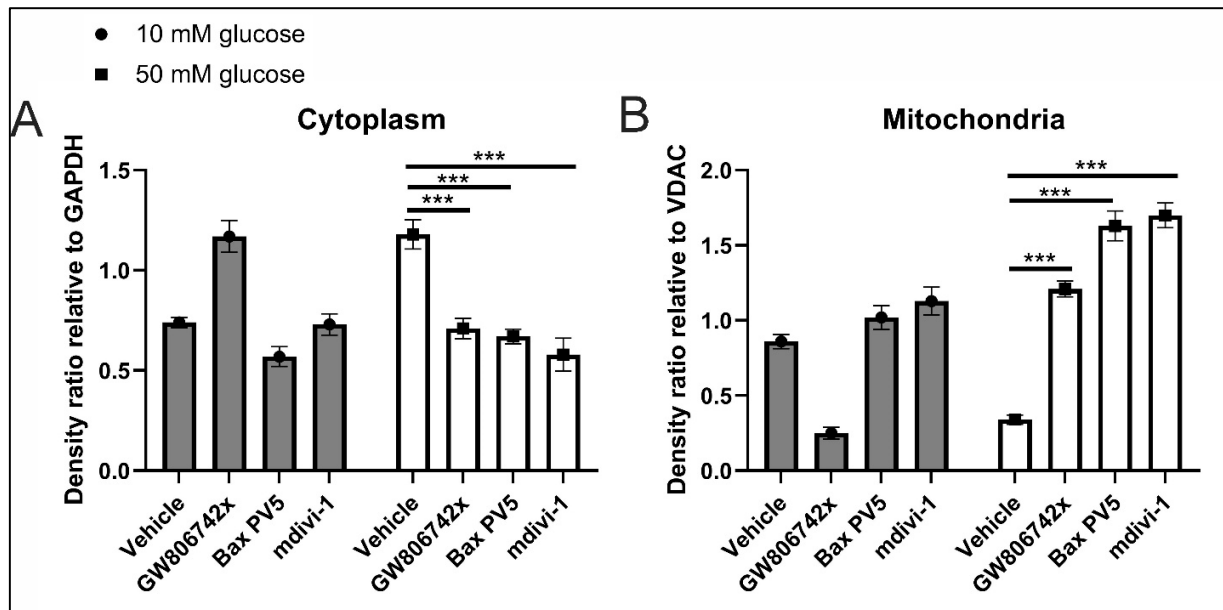

**Figure S7: Effect of MLKL, Bax, and Drp1 inhibition on cytoplasmic and mitochondrial levels of cytochrome c (cyt c).** **A).** Quantification of cyt c from cytoplasmic fractions from blots represented in Fig. 8. **B).** Quantification of cyt c from cytoplasmic fractions from blot represented in Fig 8. Results are from 3 independent experiments. Two-way ANOVA with Bonferroni posttest, \*\*\* $p < 0.001$ .
